# Supplementary material for: Evaluating the mosquito vector range for two orthobunyaviruses: Oya virus and Ebinur Lake Virus
Source: Research Square preprint supplement (doi:10.21203/rs.3.rs-3969850/v1), 2024-02-23
Supplement: Supplementary file 1 [file 02d28022961c9a21a21b757f.xlsx]

## Sheet: Sheet1
Table S1. The correlation between OYAV and EBIV induced cytopathic effect in BHK-21 cells and Ct values of virus RNA by qRT-PCR.
Virus	Virus titer (PFU/mL)	Virus dose used to inoculate flask (PFU)	Days Post-Inoculation that CPE Appeared	Ct values
OYAV	3.1 x 106	3.1 x 105	2	19.35
	3.1 x 105	3.1 x 104	2	22.64
	3.1 x 104	3.1 x 103	2	25.48
	3.1 x 103	3.1 x 102	2	28.86
	3.1 x 102	3.1 x 101	2	32.07
	3.1 x 101	3.1	2	35.76
	3.1	0.31	-	37.89
	0.31	0.031	-	N/A
EBIV	1.6 x 106	1.6 x 105	2	18.98
	1.6 x 105	1.6 x 104	2	20.82
	1.6 x 104	1.6 x 103	2	23.69
	1.6 x 103	1.6 x 102	2	27.12
	1.6 x 102	1.6 x 101	2	30.6
	1.6 x 101	1.6	2	34.85
	1.6	0.16	2	35.58
	0.16	0.016	-	N/A
N/A: Denotes that no RNA was detected
-: Denotes that the cell does not show CPE
